# Supplementary material for: Selection of reliable reference genes for normalization of quantitative RT-PCR from different developmental stages and tissues in amphioxus
Source: PubMed Central journal article supplement (PMC5116582; doi:10.1038/srep37549), 2016-11-21
Supplement: srep37549-s1.pdf [file srep37549-s1.pdf]

## **Supplementary Information**

### **Selection of reliable reference genes for normalization of quantitative RT-PCR from different developmental stages and tissues in amphioxus**

Qi-Lin Zhang<sup>1, †</sup>, Qian-Hua Zhu<sup>4, †</sup>, Xin Liao<sup>1, †</sup>, Xiu-Qiang Wang<sup>1</sup>, Tao Chen<sup>4</sup>, Han-Ting Xu<sup>1</sup>, Juan Wang<sup>2</sup>, Ming-Long Yuan<sup>2,\*</sup> & Jun-Yuan Chen<sup>1, 3\*</sup>

<sup>1</sup>Evo-devo Institute, School of Life Sciences, Nanjing University, Nanjing 210008, China.

<sup>2</sup>State Key Laboratory of Grassland Agro-Ecosystems, College of Pastoral Agricultural Science and Technology, Lanzhou University, Lanzhou 730020, China.

<sup>3</sup>Nanjing Institute of Geology and Paleontology, Nanjing 210008, China.

<sup>4</sup>BGI-Shenzhen, Shenzhen 518000, China.

<sup>†</sup>These authors contributed equally to this work.

\*Correspondence and requests for materials should be addressed to M.L.Y. (yuanml@lzu.edu.cn) or J.Y.C. (chenjy@nju.edu.cn).

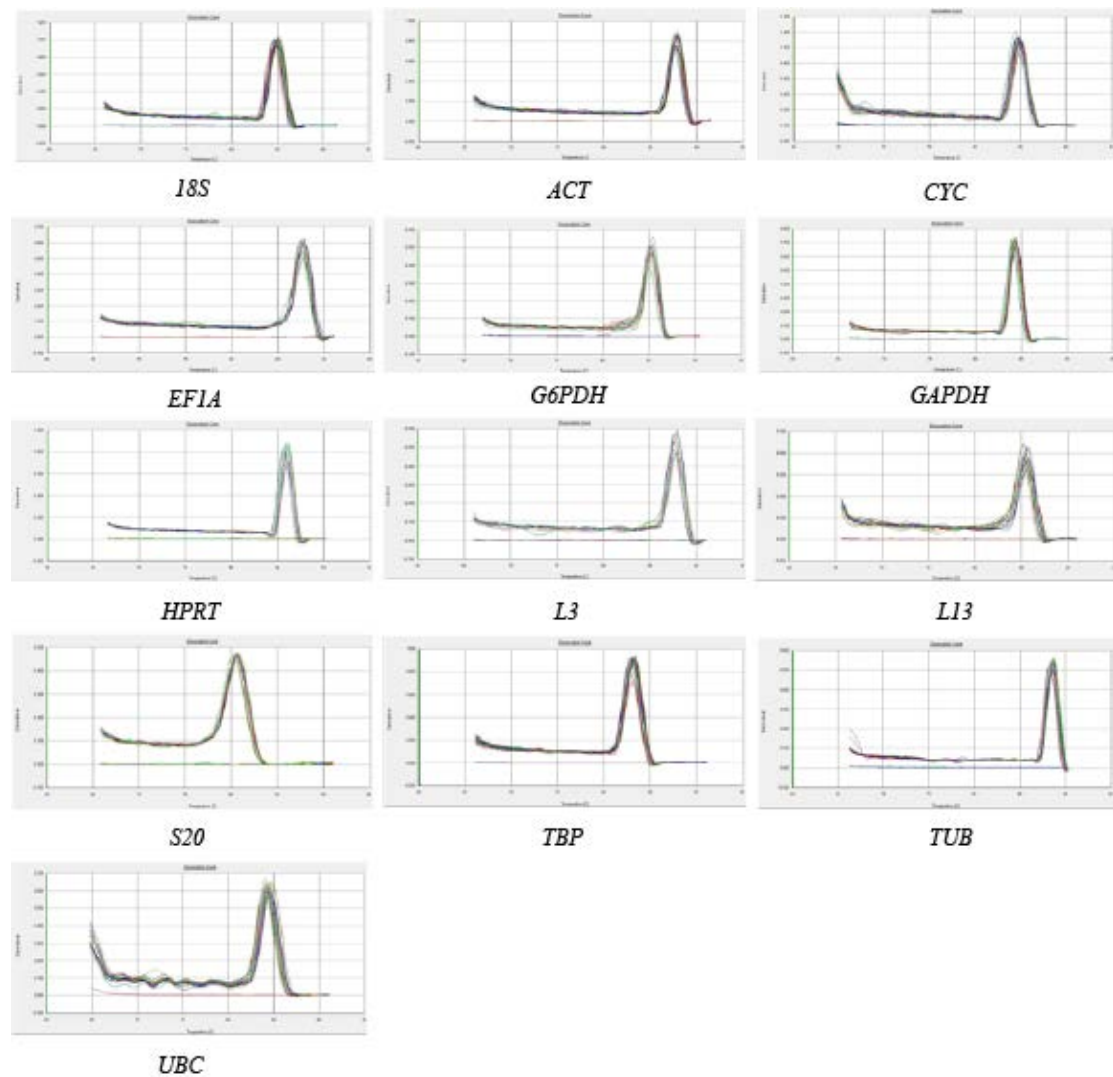

**Supplementary Figure S1.** Dissociation curves of thirteen candidate reference genes ((*18S*) *18S* ribosomal RNA; (*ACT*) *beta-actin*; (*CYC*) *cyclophilin*; (*EF1A*) *elongation factor 1 alpha*; (*G6PDH*) *glucose 6-phosphate dehydrogenase*; (*GAPDH*) *glyceraldehyde-3-phosphate dehydrogenase*; (*HPRT*) *hypoxanthine-guanine Phosphoribosyltransferase*; (*L3*) *ribosomal protein L3*; (*L13*) *ribosomal protein L13*; (*S20*) *ribosomal protein S20*; (*TBP*) *TATA box binding protein*; (*TUB*) *alpha-tubulin*; (*UBC*) *ubiquitin-conjugating enzyme*) reveal single peaks, which obtained from three technical replicates of different cDNA samples along with no template control.

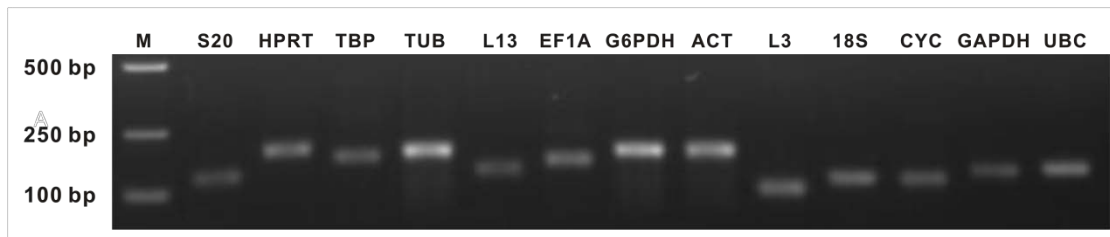

**Supplementary Figure S2.** 1.5 % agarose gel electrophoresis is exhibiting specific qRT-PCR products with expected size for each candidate reference gene. (M) DNA marker (Takara, DL 2000); (*S20*) ribosomal protein *S20*; (*HPRT*) hypoxanthine-guanine Phosphoribosyltransferase; (*TBP*) TATA box binding protein; (*TUB*) alpha-tubulin; (*L13*) ribosomal protein *L13*; (*EF1A*) elongation factor 1 alpha; (*G6PDH*) glucose 6-phosphate dehydrogenase; (*ACT*) beta-actin; (*L3*) ribosomal protein *L3*; (*18S*) 18S ribosomal RNA; (*CYC*) cyclophilin; (*GAPDH*) glyceraldehyde-3-phosphate dehydrogenase; (*UBC*) ubiquitin-conjugating enzyme.

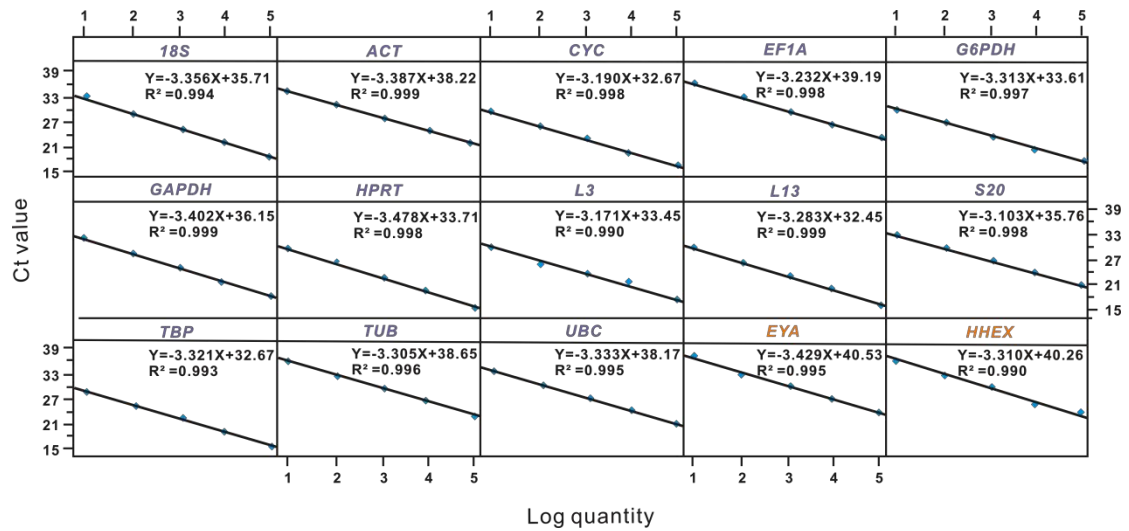

**Supplementary Figure S3.** Standard curves of thirteen candidate reference genes and two target genes. Line relations and correlation coefficient ( $R^2$ ) between Ct values and Log quantity were calculated by SigmaPlot 12.0 software.

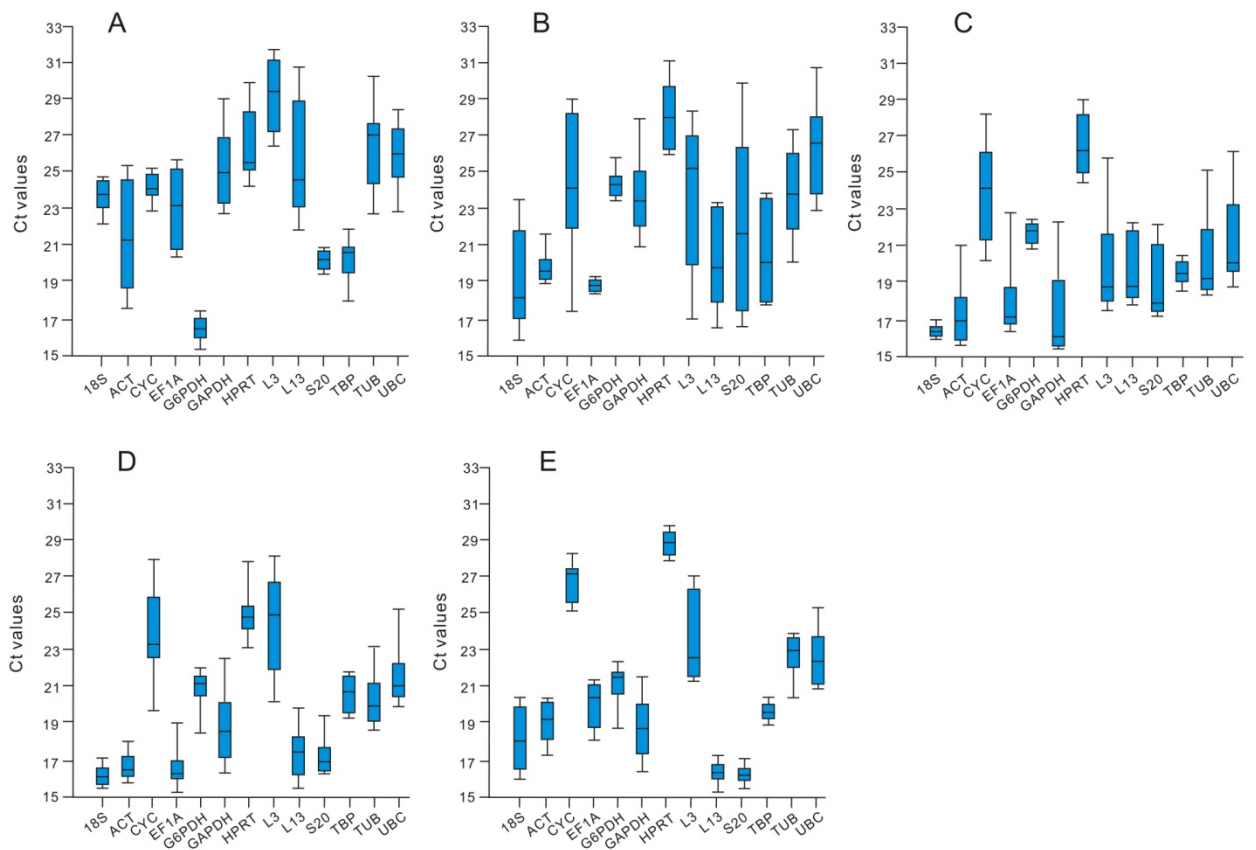

**Supplementary Figure S4.** Ct values of thirteen candidate housekeeping genes among samples for each developmental condition. Including different developmental stages (A), different normal tissues (B), challenged intestine with LPS (C), challenged gill with LPS (D) and challenged hepatic caecum with LPS (E). The line in the box indicates median. The box describes the 25th and 75th percentiles, and the maximum and minimum values were represented by up and low caps.

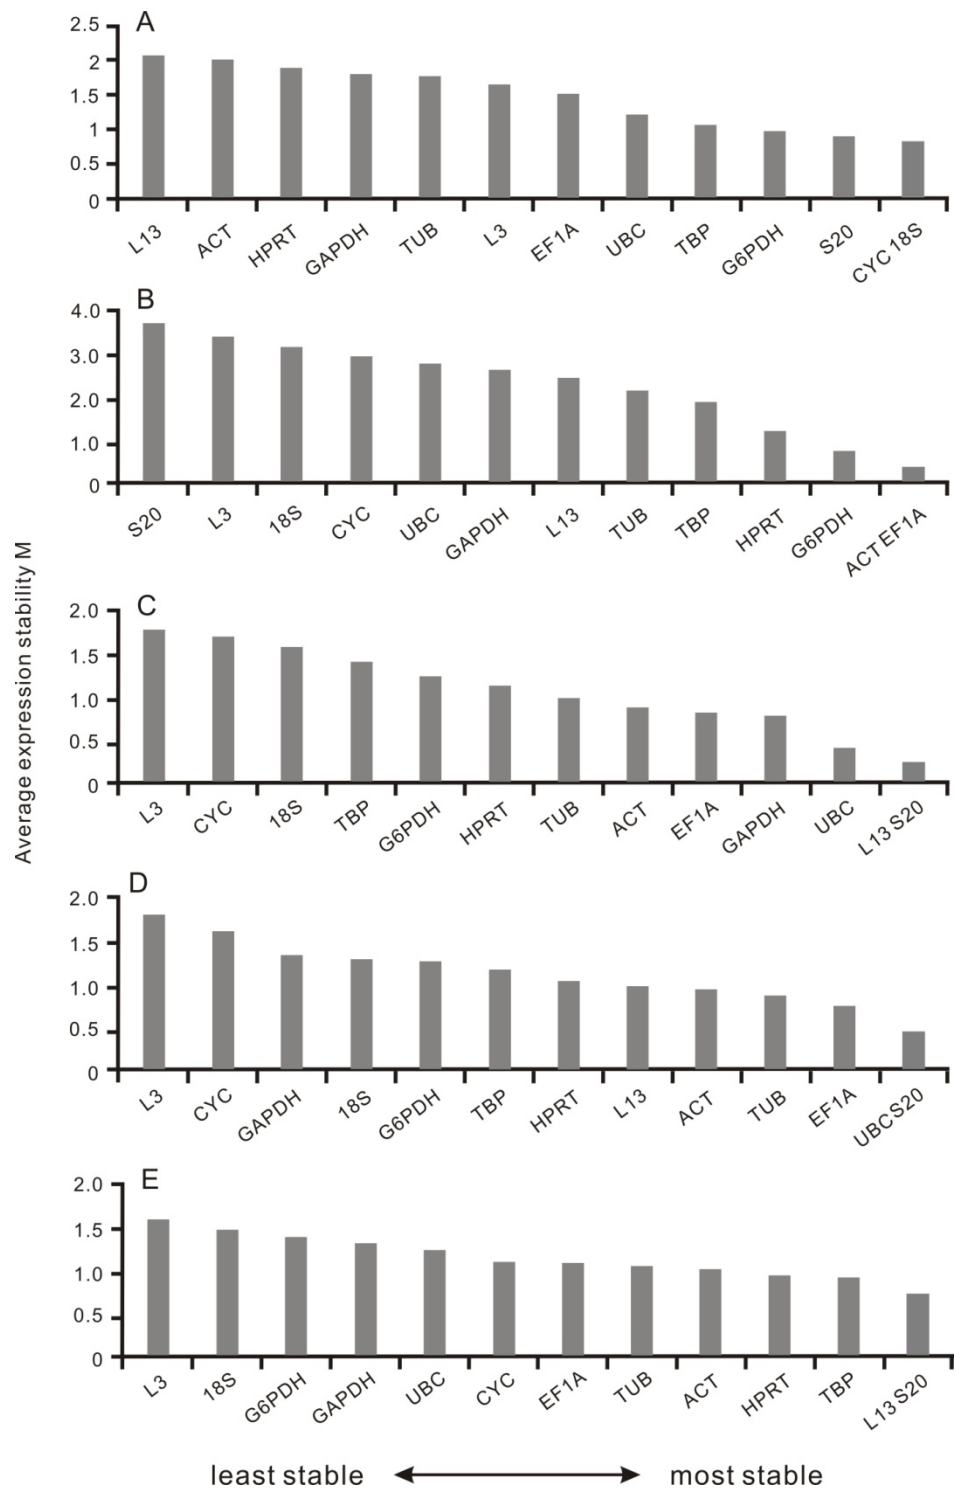

**Supplementary Figure S5.** geNorm ranking of expression stability of 13 candidate reference genes under five different experimental conditions. Different developmental stage (A), different normal tissues (B), challenged intestine (C), challenged gill (D) and challenged hepatic caecum (E).

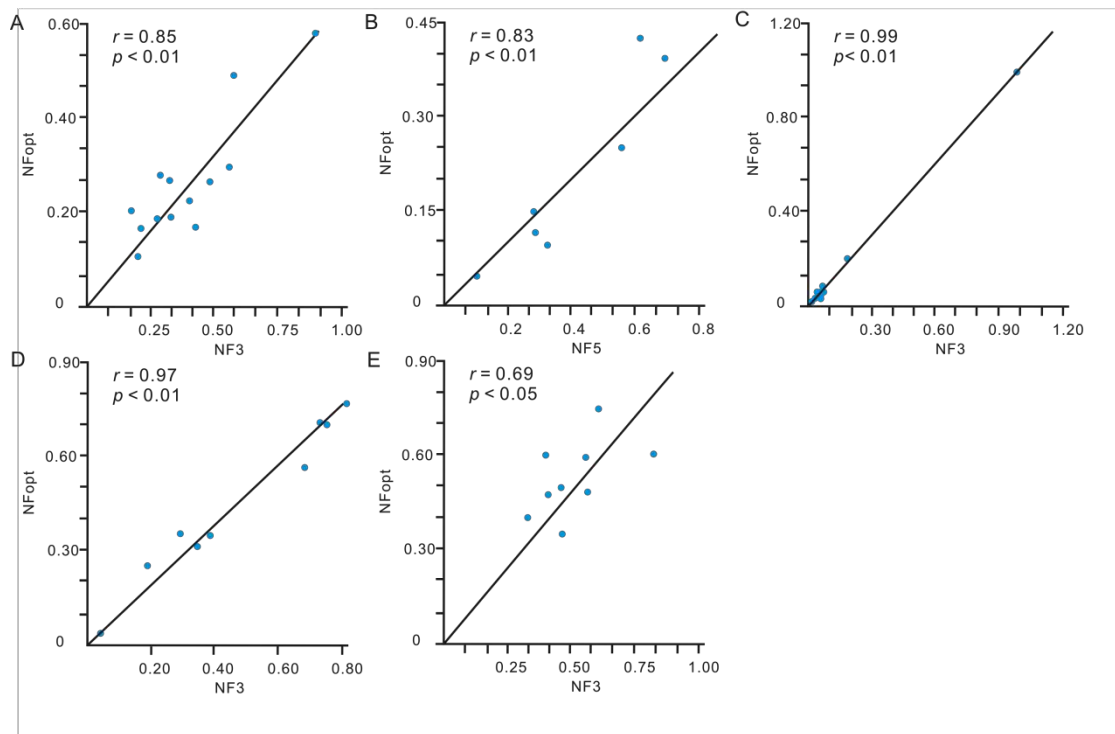

**Supplementary Figure S6.** Pearson correlations between optimal normalization factors (NF<sub>opt</sub>) from geNorm software and three or five normalization factor (NF<sub>3</sub> or NF<sub>5</sub>) for different developmental stages (A), different normal tissues (B), challenged intestine (C), challenged gill (D) and challenged hepatic caecum (E), which were evaluated by IBM SPSS statistics 22 software.

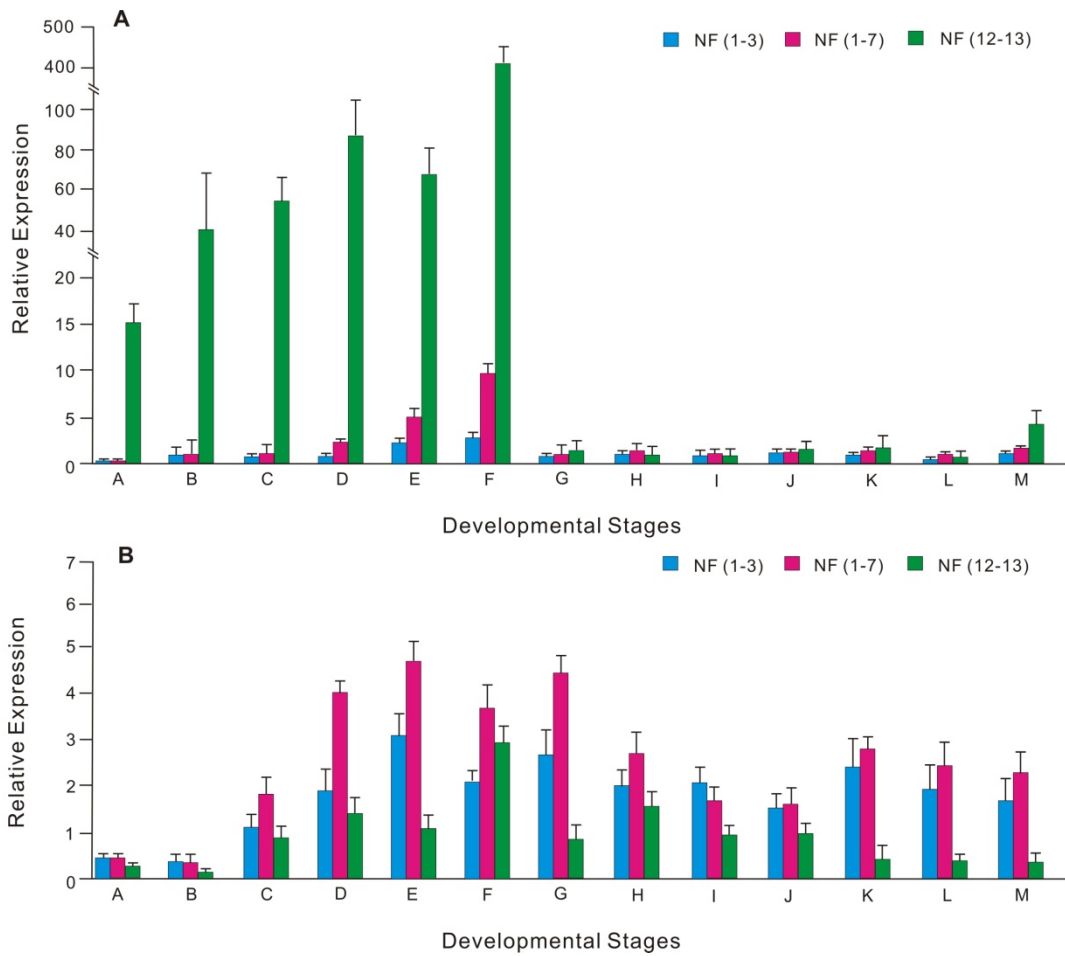

**Supplementary Figure S7.** Expression profiles of the *EYA* (A) and *HHEX* (B) based on different normalization factors under different developmental stages. A, 8-cell stage; B, morula stage; C, blastula stage; D, middle gastrula stage; E, late gastrula stage; F, neurula stage; G, hatching stage; H, 10-somites stage; I, mouse-opening stage; J, 2-gill arch stage; K, two weeks after fertilization; L, two month after fertilization; M, adult stage. The normalization of *EYA* were performed by using the top three [NF (1-3)], the top seven reference genes [NF (1-7)], and two reference gene with the least stability (NF12-13). Data were exhibited as mean delta Ct values  $\pm$  their standard deviations.



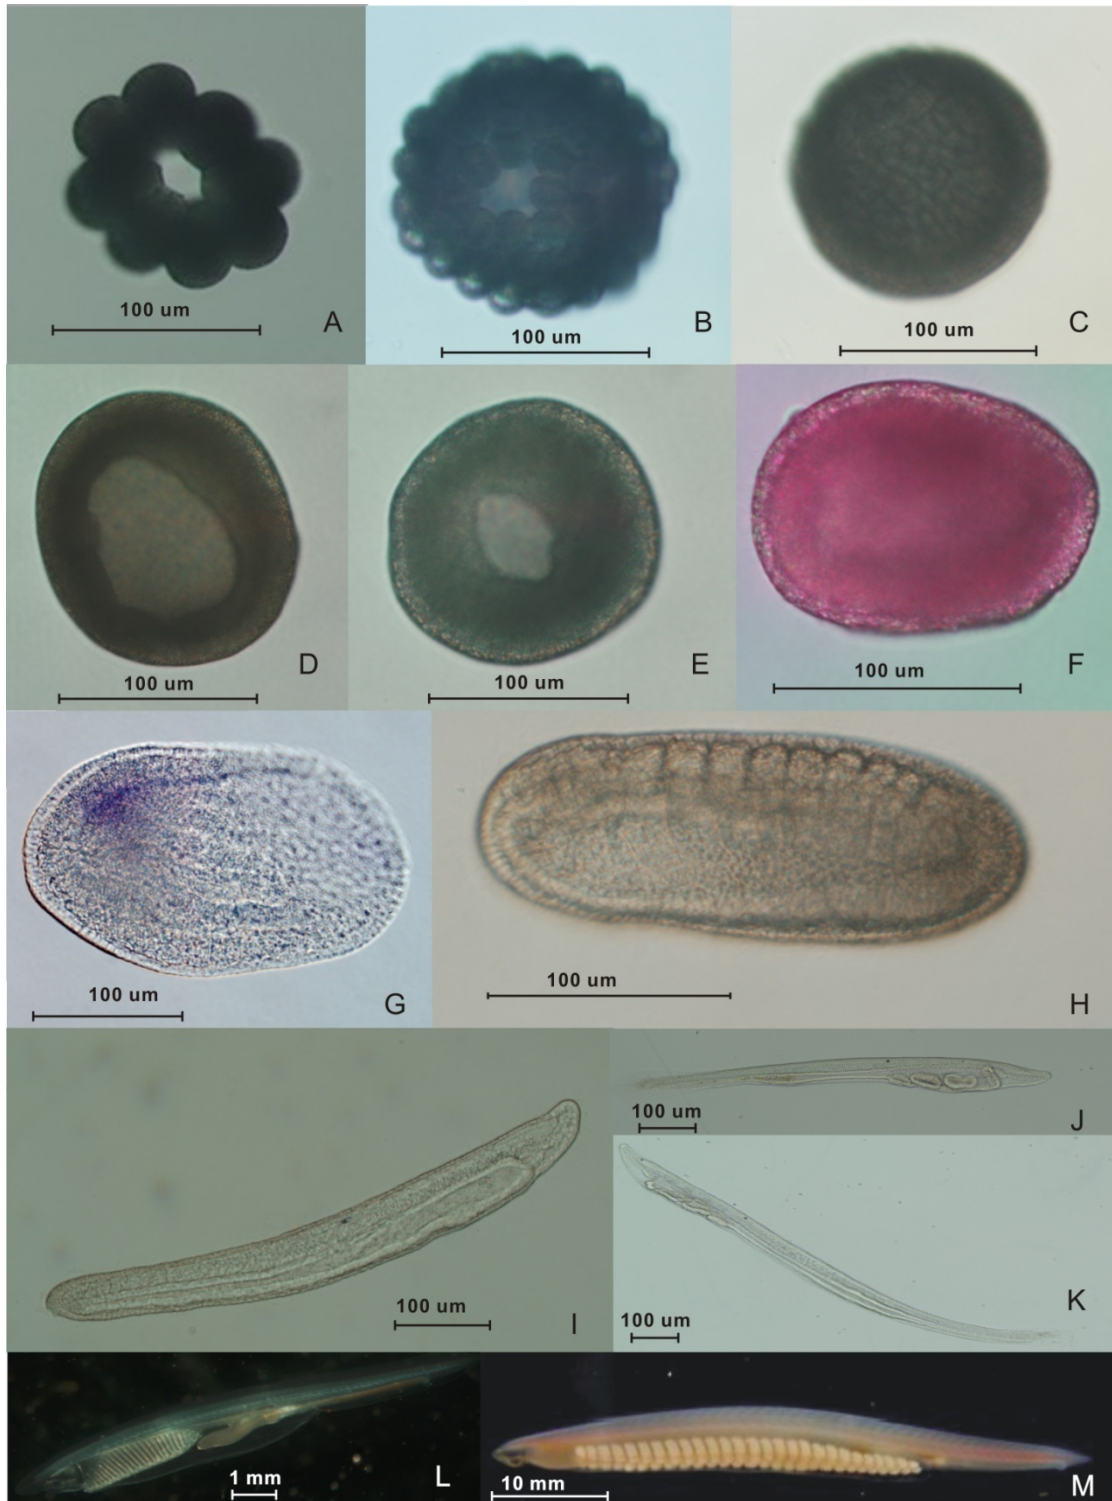

**Supplementary Figure S8.** Different developmental stages of *B. belcheri*, including 8-cell stage (A), morula (B), blastula (C), middle gastrula stage (D), late gastrula stage (E), neurula (F), hatching stage (G), 10 somites (H), mouse-opening stage (I), 2-gill arch stage (J), two weeks after fertilization (K), two month after fertilization (L), adult stage (M). Photographed by Olympus DP71.

**Supplementary Table S1.** The mean and standard deviation (SD) of the Ct values under five different experimental conditions.

|                              |        | <i>18S</i> | <i>ACT</i> | <i>CYC</i> | <i>EF1A</i> | <i>G6PDH</i> | <i>GAPDH</i> | <i>HPRT</i> | <i>L3</i> | <i>L13</i> | <i>S20</i> | <i>TBP</i> | <i>TUB</i> | <i>UBC</i> |
|------------------------------|--------|------------|------------|------------|-------------|--------------|--------------|-------------|-----------|------------|------------|------------|------------|------------|
| Different development stages | Ctmean | 23.35      | 21.44      | 24.22      | 23.06       | 16.48        | 25.05        | 26.54       | 29.02     | 25.28      | 20.11      | 20.16      | 25.90      | 25.41      |
|                              | SD     | 0.88       | 2.98       | 0.82       | 1.96        | 0.72         | 2.31         | 2.17        | 2.05      | 3.30       | 0.61       | 1.17       | 2.31       | 1.68       |
| Different tissues            | Ctmean | 18.89      | 19.83      | 24.33      | 18.54       | 24.29        | 23.24        | 28.15       | 23.85     | 19.91      | 21.92      | 20.73      | 23.84      | 26.63      |
|                              | SD     | 3.02       | 0.85       | 4.08       | 0.17        | 0.85         | 1.07         | 1.86        | 4.33      | 2.75       | 4.99       | 2.75       | 2.58       | 2.80       |
| Challenged intestine         | Ctmean | 16.60      | 17.50      | 23.88      | 17.42       | 21.31        | 17.21        | 26.37       | 20.22     | 19.47      | 19.10      | 19.55      | 19.94      | 21.14      |
|                              | SD     | 0.27       | 2.33       | 2.80       | 2.53        | 0.60         | 2.87         | 1.64        | 3.33      | 1.88       | 1.95       | 0.70       | 2.33       | 2.53       |
| Challenged gill              | Ctmean | 15.72      | 16.27      | 23.66      | 16.83       | 20.84        | 18.65        | 24.93       | 24.67     | 17.32      | 16.82      | 20.65      | 20.04      | 21.63      |
|                              | SD     | 0.68       | 0.85       | 2.63       | 1.53        | 0.99         | 2.20         | 1.46        | 3.33      | 1.47       | 1.48       | 1.11       | 1.41       | 1.70       |
| Challenged hepatic caecum    | Ctmean | 18.27      | 19.21      | 26.84      | 20.10       | 21.23        | 18.80        | 28.82       | 23.84     | 16.46      | 15.91      | 19.48      | 22.93      | 22.39      |
|                              | SD     | 1.57       | 1.07       | 1.04       | 1.23        | 1.32         | 1.60         | 0.66        | 2.67      | 0.67       | 0.53       | 0.64       | 1.00       | 1.63       |

See Figure S1 for full names of thirteen reference genes.

**Supplementary Table S2.** Intra-group variation estimates by NormFinder for five different experimental conditions.

|                              | <i>18S</i> | <i>ACT</i> | <i>CYC</i> | <i>EF1A</i> | <i>G6PDH</i> | <i>GAPDH</i> | <i>HPRT</i> | <i>L3</i> | <i>L13</i> | <i>S20</i> | <i>TBP</i> | <i>TUB</i> | <i>UBC</i> |
|------------------------------|------------|------------|------------|-------------|--------------|--------------|-------------|-----------|------------|------------|------------|------------|------------|
| Different development stages | 0.183      | 0.301      | 0.196      | 0.162       | 0.228        | 0.227        | 0.310       | 0.187     | 0.359      | 0.175      | 0.236      | 0.215      | 0.209      |
| Different tissues            | 0.723      | 0.501      | 0.697      | 0.347       | 0.405        | 0.573        | 0.484       | 0.940     | 0.474      | 1.089      | 0.346      | 0.508      | 0.610      |
| Challenged intestine         | 0.343      | 0.192      | 0.326      | 0.220       | 0.260        | 0.216        | 0.197       | 0.458     | 0.148      | 0.239      | 0.283      | 0.265      | 0.185      |
| Challenged gill              | 0.266      | 0.164      | 0.430      | 0.152       | 0.247        | 0.246        | 0.233       | 0.484     | 0.169      | 0.144      | 0.274      | 0.176      | 0.158      |
| Challenged hepatic caecum    | 0.267      | 0.147      | 0.220      | 0.178       | 0.266        | 0.257        | 0.180       | 0.412     | 0.155      | 0.141      | 0.169      | 0.197      | 0.233      |

**Supplementary Table S3.** Pairwise comparison of candidate reference genes for each experimental condition\*.

|                                | Gene         |      | Pair1 | Pair2 | Pair3 | Pair4 | Pair5 | Pair6 | Pair7 | Pair8 | Pair9 | Pair10 | Pair11 | Pair12 | Avg SD |
|--------------------------------|--------------|------|-------|-------|-------|-------|-------|-------|-------|-------|-------|--------|--------|--------|--------|
| Different developmental stages | <i>EF1A</i>  | Mean | 1.95  | -1.64 | 2.75  | -2.89 | 2.28  | 0.19  | 3.56  | 1.05  | -2.97 | 5.92   | 2.30   | -6.68  |        |
|                                |              | SD   | 1.83  | 1.55  | 1.20  | 2.44  | 2.00  | 1.61  | 2.76  | 1.94  | 1.76  | 0.77   | 1.77   | 2.26   | 1.82   |
|                                | <i>S2O</i>   | Mean | 4.92  | 1.32  | 5.71  | 0.07  | 5.24  | 2.97  | 3.16  | 6.52  | 4.02  | 8.89   | 5.27   | -3.71  |        |
|                                |              | SD   | 2.29  | 2.70  | 2.28  | 1.42  | 1.83  | 1.76  | 0.87  | 2.19  | 0.88  | 1.76   | 3.02   | 1.08   | 1.84   |
|                                | <i>G6PDH</i> | Mean | 1.76  | -1.83 | 2.56  | -3.08 | 2.09  | -0.19 | 3.37  | 0.86  | -3.16 | 5.73   | 2.11   | -6.87  |        |
|                                |              | SD   | 2.40  | 2.73  | 2.10  | 1.69  | 1.59  | 1.61  | 2.55  | 0.80  | 0.87  | 1.65   | 2.98   | 1.36   | 1.86   |
|                                | <i>CYC</i>   | Mean | 0.90  | -2.69 | 1.69  | -3.95 | 1.22  | -1.05 | -0.86 | 2.50  | -4.02 | 4.87   | 1.25   | -7.73  |        |
|                                |              | SD   | 2.11  | 3.05  | 2.34  | 1.31  | 1.23  | 1.94  | 0.80  | 2.27  | 0.88  | 2.09   | 3.32   | 1.22   | 1.88   |
|                                | <i>18S</i>   | Mean | 8.63  | 5.03  | 9.42  | 3.78  | 8.95  | 6.68  | 6.87  | 10.23 | 7.73  | 3.71   | 12.60  | 8.98   |        |
|                                |              | SD   | 2.36  | 2.31  | 2.40  | 0.94  | 1.81  | 2.26  | 1.36  | 2.20  | 1.22  | 1.08   | 2.33   | 2.43   | 1.89   |
|                                | <i>L3</i>    | Mean | -3.97 | -7.56 | -3.17 | -8.81 | -3.64 | -5.92 | -5.73 | -2.36 | -4.87 | -8.89  | -3.62  | -12.60 |        |
|                                |              | SD   | 2.30  | 1.60  | 1.57  | 2.53  | 2.25  | 0.77  | 1.65  | 2.90  | 2.09  | 1.76   | 1.55   | 2.33   | 1.94   |
|                                | <i>TUB</i>   | Mean | -0.84 | -4.46 | -5.74 | -0.49 | -2.84 | -2.55 | 0.64  | -1.68 | -5.79 | 3.12   | -0.62  | -9.42  |        |
|                                |              | SD   | 1.71  | 1.82  | 2.40  | 1.98  | 1.20  | 2.01  | 2.88  | 2.25  | 2.20  | 1.51   | 2.12   | 2.29   | 2.03   |
|                                | <i>UBC</i>   | Mean | -0.32 | -3.92 | 0.47  | -5.17 | -2.28 | -2.09 | 1.28  | -1.22 | -5.24 | 3.64   | 0.02   | -8.95  |        |
|                                |              | SD   | 1.53  | 3.08  | 2.07  | 1.60  | 2.00  | 1.59  | 2.15  | 1.23  | 1.83  | 2.25   | 3.29   | 1.81   | 2.04   |
|                                | <i>GAPDH</i> | Mean | -3.62 | 0.84  | -4.89 | 0.36  | -1.99 | -1.71 | 1.48  | -0.83 | -4.94 | 3.97   | 0.22   | -8.57  |        |
|                                |              | SD   | 2.33  | 1.71  | 2.08  | 1.47  | 1.76  | 2.31  | 2.01  | 2.03  | 2.20  | 2.20   | 2.90   | 2.27   | 2.10   |
|                                | <i>TBP</i>   | Mean | 4.85  | 1.25  | 5.64  | 5.17  | 2.89  | 3.08  | 6.45  | 3.95  | -0.07 | 8.81   | 5.19   | -3.78  |        |
|                                |              | SD   | 2.16  | 3.32  | 2.48  | 1.60  | 2.44  | 1.69  | 1.98  | 1.31  | 1.42  | 2.53   | 3.60   | 0.94   | 2.12   |
|                                | <i>ACT</i>   | Mean | 3.62  | 4.46  | -1.27 | 3.98  | 1.63  | 1.91  | 5.10  | 2.79  | -1.33 | 7.59   | 0.22   | -4.95  |        |
|                                |              | SD   | 2.33  | 1.82  | 3.18  | 2.96  | 1.48  | 2.63  | 2.98  | 2.94  | 2.59  | 1.53   | 2.90   | 3.14   | 2.54   |
|                                | <i>HPRT</i>  | Mean | -1.60 | -5.20 | -0.81 | -6.45 | -1.28 | -3.56 | -3.37 | -2.50 | -6.52 | 2.36   | -1.26  | -10.23 |        |
|                                |              | SD   | 2.05  | 3.09  | 2.94  | 1.98  | 2.15  | 2.76  | 2.55  | 2.27  | 2.19  | 2.90   | 3.96   | 2.20   | 2.59   |

|                          |              |       |       |       |       |       |       |       |       |       |       |       |       |       |      |
|--------------------------|--------------|-------|-------|-------|-------|-------|-------|-------|-------|-------|-------|-------|-------|-------|------|
| Different normal tissues | <i>L13</i>   | Mean  | -0.35 | -3.94 | 0.45  | -5.19 | -0.02 | -2.30 | -2.11 | 1.26  | -1.25 | -5.27 | 3.62  | -8.98 |      |
|                          |              | SD    | 3.00  | 1.91  | 2.11  | 3.60  | 3.29  | 1.77  | 2.98  | 3.96  | 3.32  | 3.02  | 1.55  | 3.53  | 2.84 |
|                          | <i>EF1A</i>  | Mean  | 4.70  | 1.28  | 5.30  | 2.19  | 8.09  | 5.75  | 9.61  | 5.78  | 3.38  | 5.31  | 1.36  | 0.34  |      |
|                          |              | SD    | 3.45  | 0.83  | 2.63  | 2.79  | 2.89  | 1.06  | 1.86  | 4.12  | 5.06  | 4.37  | 2.87  | 3.06  | 2.92 |
|                          | <i>G6PDH</i> | Mean  | -1.05 | -4.47 | -0.45 | -3.56 | 2.33  | -5.75 | 3.86  | 0.03  | -2.37 | -0.44 | -4.39 | -5.41 |      |
|                          |              | SD    | 3.60  | 1.29  | 3.23  | 3.49  | 3.22  | 1.06  | 2.60  | 4.73  | 4.15  | 4.95  | 3.22  | 2.21  | 3.14 |
|                          | <i>ACT</i>   | Mean  | 3.42  | 4.31  | 1.44  | 6.05  | -0.31 | 3.58  | 7.59  | 4.66  | 3.02  | 3.41  | 0.56  | -0.24 |      |
|                          |              | SD    | 3.23  | 2.61  | 2.62  | 4.14  | 1.86  | 3.12  | 2.63  | 3.78  | 4.17  | 4.13  | 3.09  | 2.78  | 3.18 |
|                          | <i>TUB</i>   | Mean  | -0.60 | -4.02 | -3.11 | 2.79  | -5.30 | 0.45  | 4.31  | 0.48  | -1.92 | 0.01  | -3.93 | -4.96 |      |
|                          |              | SD    | 2.19  | 2.50  | 1.14  | 3.68  | 2.63  | 3.23  | 3.05  | 2.65  | 6.55  | 3.68  | 2.90  | 4.93  | 3.26 |
|                          | <i>L3</i>    | Mean  | 3.34  | -0.08 | 3.93  | 0.83  | 6.72  | -1.36 | 4.39  | 8.24  | 4.42  | 2.02  | 3.94  | -1.02 |      |
|                          |              | SD    | 3.41  | 2.48  | 2.90  | 3.24  | 3.43  | 2.87  | 3.22  | 2.77  | 3.07  | 5.57  | 3.33  | 4.49  | 3.40 |
|                          | <i>TBP</i>   | Mean  | 2.51  | -0.91 | 3.11  | 5.90  | -2.19 | 3.56  | 7.42  | 3.59  | 1.19  | 3.12  | -0.83 | -1.85 |      |
|                          |              | SD    | 2.11  | 2.79  | 1.14  | 3.05  | 2.79  | 3.49  | 3.37  | 3.28  | 6.81  | 4.45  | 3.24  | 4.99  | 3.46 |
|                          | <i>HPRT</i>  | Mean  | -4.91 | -8.32 | -4.31 | -7.42 | -1.52 | -9.61 | -3.86 | -3.82 | -6.23 | -4.30 | -8.24 | -9.26 |      |
|                          |              | SD    | 4.50  | 1.80  | 3.05  | 3.37  | 3.94  | 1.86  | 2.60  | 3.30  | 6.31  | 3.61  | 2.77  | 4.63  | 3.48 |
|                          | <i>GAPDH</i> | Mean  | -3.42 | 0.60  | -2.51 | 3.38  | -4.70 | 1.05  | 4.91  | 1.08  | -1.32 | 0.61  | -3.34 | -4.36 |      |
|                          |              | SD    | 3.53  | 2.19  | 2.11  | 3.19  | 3.45  | 3.60  | 4.50  | 4.46  | 5.71  | 5.53  | 3.68  | 4.39  | 3.86 |
|                          | <i>UBC</i>   | Mean  | -3.38 | -6.80 | -2.79 | -5.90 | -8.09 | -2.33 | 1.52  | -2.30 | -4.70 | -2.78 | -6.72 | -7.74 |      |
|                          |              | SD    | 3.19  | 3.22  | 3.68  | 3.05  | 2.89  | 3.22  | 3.94  | 5.45  | 5.34  | 6.03  | 3.43  | 3.55  | 3.91 |
| <i>18S</i>               | Mean         | 4.36  | 0.94  | 4.96  | 1.85  | 7.74  | -0.34 | 5.41  | 9.26  | 5.44  | 3.04  | 4.96  | 1.02  |       |      |
|                          | SD           | 4.39  | 3.32  | 4.93  | 4.99  | 3.55  | 3.06  | 2.21  | 4.63  | 6.66  | 2.42  | 6.69  | 4.49  | 4.28  |      |
| <i>CYC</i>               | Mean         | -1.08 | -4.50 | -0.48 | -3.59 | 2.30  | -5.78 | -0.03 | 3.82  | -2.40 | -0.48 | -4.42 | -5.44 |       |      |
|                          | SD           | 4.46  | 3.62  | 2.65  | 3.28  | 5.45  | 4.12  | 4.73  | 3.30  | 8.00  | 2.60  | 3.07  | 6.66  | 4.33  |      |
| <i>L3</i>                | Mean         | -0.61 | -4.02 | -0.01 | -3.12 | 2.78  | -5.31 | 0.44  | 4.30  | 0.48  | -1.93 | -3.94 | -4.96 |       |      |

|                                  |              |      |       |       |       |       |       |       |       |       |       |       |       |       |      |
|----------------------------------|--------------|------|-------|-------|-------|-------|-------|-------|-------|-------|-------|-------|-------|-------|------|
|                                  |              | SD   | 5.53  | 3.99  | 3.68  | 4.45  | 6.03  | 4.37  | 4.95  | 3.61  | 2.60  | 7.83  | 3.33  | 6.69  | 4.76 |
|                                  | <i>S20</i>   | Mean | 1.32  | -2.10 | 1.92  | -1.19 | 4.70  | -3.38 | 2.37  | 6.23  | 2.40  | 1.93  | -2.02 | -3.04 |      |
|                                  |              | SD   | 5.71  | 5.17  | 6.55  | 6.81  | 5.34  | 5.06  | 4.15  | 6.31  | 8.00  | 7.83  | 5.57  | 2.42  | 5.74 |
| Challenged in steine<br>with LPS | <i>S20</i>   | Mean | -1.89 | -1.60 | 0.84  | 0.45  | 2.04  | -1.68 | 2.21  | 7.27  | 4.78  | 1.12  | 0.37  | -2.50 |      |
|                                  |              | SD   | 1.16  | 1.09  | 1.29  | 1.63  | 0.80  | 1.04  | 1.57  | 1.13  | 1.85  | 1.99  | 0.29  | 1.99  | 1.32 |
|                                  | <i>L13</i>   | Mean | -2.26 | -1.96 | 0.47  | 0.08  | 1.67  | -2.04 | 1.84  | 6.90  | 4.42  | -0.37 | 0.76  | -2.87 |      |
|                                  |              | SD   | 1.35  | 1.21  | 1.51  | 1.55  | 0.90  | 1.21  | 1.53  | 1.17  | 1.70  | 0.29  | 2.07  | 1.96  | 1.37 |
|                                  | <i>UBC</i>   | Mean | -3.93 | -3.39 | -1.37 | -1.59 | -3.71 | 0.17  | 5.23  | 2.75  | -2.04 | -0.91 | -1.67 | -4.54 |      |
|                                  |              | SD   | 0.69  | 1.38  | 1.94  | 2.10  | 0.74  | 2.14  | 1.45  | 1.83  | 0.80  | 2.34  | 0.90  | 2.59  | 1.58 |
|                                  | <i>ACT</i>   | Mean | -0.30 | 2.44  | 2.05  | 3.63  | -0.08 | 3.81  | 8.87  | 6.38  | 1.60  | 2.72  | 1.96  | -0.90 |      |
|                                  |              | SD   | 1.01  | 1.22  | 1.99  | 1.09  | 0.55  | 2.02  | 1.68  | 2.16  | 1.09  | 2.68  | 1.21  | 2.38  | 1.59 |
|                                  | <i>HPRT</i>  | Mean | -9.16 | -8.87 | -6.43 | -6.82 | -5.23 | -8.95 | -5.06 | -2.49 | -7.27 | -6.15 | -6.90 | -9.77 |      |
|                                  |              | SD   | 1.72  | 1.68  | 1.44  | 1.39  | 1.45  | 1.64  | 1.20  | 2.55  | 1.13  | 2.61  | 1.17  | 1.60  | 1.63 |
|                                  | <i>EF1A</i>  | Mean | -0.14 | 0.08  | 2.52  | 2.13  | 3.71  | 4.66  | 7.58  | 6.51  | 3.12  | 2.73  | 2.01  | 0.36  |      |
|                                  |              | SD   | 0.58  | 0.55  | 1.26  | 2.16  | 0.74  | 1.01  | 3.95  | 1.63  | 2.78  | 2.57  | 1.15  | 1.59  | 1.66 |
|                                  | <i>GAPDH</i> | Mean | 0.30  | 2.73  | 2.34  | 3.93  | 0.22  | 4.11  | 9.16  | 6.68  | 1.89  | 3.02  | 2.26  | -0.61 |      |
|                                  |              | SD   | 1.01  | 1.27  | 2.52  | 0.69  | 0.58  | 2.46  | 1.72  | 2.28  | 1.15  | 2.32  | 1.35  | 2.89  | 1.69 |
|                                  | <i>TUB</i>   | Mean | -2.73 | -2.44 | -0.39 | 1.20  | -2.52 | 1.37  | 6.43  | 3.94  | -0.84 | 0.28  | -0.47 | -3.34 |      |
|                                  |              | SD   | 1.27  | 1.22  | 2.25  | 1.57  | 1.26  | 1.94  | 1.44  | 2.90  | 1.29  | 2.26  | 1.51  | 2.25  | 1.76 |
|                                  | <i>G6PDH</i> | Mean | -4.10 | -3.81 | -1.37 | -1.76 | -0.17 | -3.89 | 5.06  | 2.57  | -2.21 | -1.09 | -1.84 | -4.71 |      |
|                                  |              | SD   | 2.46  | 2.02  | 1.94  | 0.69  | 2.14  | 2.15  | 1.20  | 2.51  | 1.57  | 2.93  | 1.53  | 0.58  | 1.81 |
|                                  | <i>TBP</i>   | Mean | -2.34 | -2.05 | 0.39  | 1.59  | -2.13 | 1.76  | 6.82  | 4.33  | -0.45 | 0.67  | -0.08 | -2.95 |      |
|                                  |              | SD   | 2.53  | 1.99  | 2.25  | 2.10  | 2.16  | 0.69  | 1.39  | 2.37  | 1.63  | 3.25  | 1.55  | 0.89  | 1.90 |
| <i>18S</i>                       | Mean         | 0.61 | 0.90  | 3.34  | 2.95  | 4.54  | 0.82  | 4.71  | 9.77  | 7.28  | 2.50  | 3.62  | 2.87  |       |      |
|                                  | SD           | 2.89 | 2.38  | 2.25  | 0.89  | 2.59  | 2.56  | 0.58  | 1.60  | 2.95  | 1.99  | 3.30  | 1.96  | 2.16  |      |



|                                       |              |      |        |       |       |       |       |       |       |       |        |       |        |        |      |
|---------------------------------------|--------------|------|--------|-------|-------|-------|-------|-------|-------|-------|--------|-------|--------|--------|------|
|                                       |              | SD   | 2.48   | 1.07  | 1.44  | 0.92  | 1.83  | 1.78  | 1.39  | 1.58  | 3.09   | 1.58  | 3.28   | 1.84   | 1.86 |
|                                       | <i>CYC</i>   | Mean | -5.01  | -7.39 | -3.62 | -3.01 | -2.03 | -6.83 | -2.82 | 1.27  | -6.84  | 1.01  | -6.34  | -7.94  |      |
|                                       |              | SD   | 2.47   | 2.75  | 2.84  | 3.26  | 2.57  | 2.46  | 2.60  | 2.75  | 2.44   | 3.28  | 2.07   | 3.09   | 2.71 |
|                                       | <i>L3</i>    | Mean | -6.02  | -8.40 | -4.63 | -4.02 | -3.04 | -7.84 | -3.83 | 0.26  | -1.01  | -7.85 | -7.35  | -8.94  |      |
|                                       |              | SD   | 2.52   | 3.09  | 2.97  | 3.58  | 2.37  | 2.52  | 3.51  | 3.35  | 3.28   | 2.42  | 2.71   | 3.28   | 2.97 |
| Challenged hepatic<br>caecum with LPS | <i>L13</i>   | Mean | 2.34   | 2.76  | 6.48  | 3.03  | 5.93  | 3.64  | 4.78  | 12.37 | 10.38  | -0.55 | 7.39   | 1.81   |      |
|                                       |              | SD   | 1.32   | 1.11  | 1.30  | 0.95  | 1.23  | 1.37  | 1.86  | 1.09  | 0.88   | 0.76  | 2.59   | 1.73   | 1.35 |
|                                       | <i>ACT</i>   | Mean | -0.41  | 3.72  | 0.27  | 3.17  | 0.89  | 2.02  | 9.61  | 7.63  | -3.30  | 4.63  | -2.76  | -0.95  |      |
|                                       |              | SD   | 1.86   | 0.94  | 0.96  | 1.45  | 0.73  | 1.80  | 1.34  | 1.41  | 1.20   | 1.99  | 1.11   | 1.47   | 1.35 |
|                                       | <i>S20</i>   | Mean | 2.89   | 3.30  | 7.03  | -4.36 | 6.48  | 4.19  | 5.32  | 12.91 | 10.93  | 7.93  | 0.55   | 2.36   |      |
|                                       |              | SD   | 1.46   | 1.20  | 1.27  | 2.11  | 1.52  | 1.33  | 1.27  | 0.88  | 1.01   | 2.41  | 0.76   | 1.54   | 1.40 |
|                                       | <i>TBP</i>   | Mean | -0.69  | -0.27 | 3.45  | 2.90  | 0.61  | 1.75  | 9.34  | 7.36  | -3.57  | 4.36  | -3.03  | -1.22  |      |
|                                       |              | SD   | 1.86   | 0.96  | 0.86  | 1.86  | 1.34  | 1.49  | 0.89  | 1.56  | 0.98   | 2.48  | 0.95   | 1.65   | 1.41 |
|                                       | <i>HPRT</i>  | Mean | -10.02 | -9.61 | -5.89 | -9.34 | -6.44 | -8.72 | -7.59 | -1.98 | -12.91 | -4.98 | -12.37 | -10.56 |      |
|                                       |              | SD   | 1.67   | 1.34  | 1.35  | 0.89  | 1.84  | 1.37  | 1.22  | 1.47  | 0.88   | 2.78  | 1.09   | 1.47   | 1.45 |
|                                       | <i>EF1A</i>  | Mean | -1.30  | -0.89 | 2.84  | -1.75 | 2.29  | 1.13  | 8.72  | 6.74  | -4.19  | 3.75  | -3.64  | -1.83  |      |
|                                       |              | SD   | 1.92   | 0.73  | 1.01  | 1.49  | 1.56  | 1.63  | 1.37  | 1.46  | 1.33   | 2.26  | 1.37   | 1.66   | 1.48 |
|                                       | <i>TUB</i>   | Mean | -4.14  | -3.72 | -3.45 | -0.55 | -2.84 | -1.70 | 5.89  | 3.91  | -7.03  | 0.91  | -6.48  | -4.67  |      |
|                                       |              | SD   | 2.06   | 0.94  | 0.86  | 1.95  | 1.01  | 1.43  | 1.35  | 1.69  | 1.27   | 2.46  | 1.30   | 1.89   | 1.52 |
|                                       | <i>CYC</i>   | Mean | -8.04  | -7.63 | -3.91 | -7.36 | -4.45 | -6.74 | -5.61 | 1.98  | -10.93 | -3.00 | -10.38 | -8.57  |      |
|                                       |              | SD   | 1.67   | 1.41  | 1.69  | 1.56  | 1.35  | 1.46  | 2.07  | 1.47  | 1.01   | 2.91  | 0.88   | 1.82   | 1.61 |
|                                       | <i>UBC</i>   | Mean | -3.59  | -3.17 | 0.55  | -2.90 | -2.29 | -1.15 | 6.44  | 4.45  | -6.48  | 1.46  | -5.93  | -4.12  |      |
|                                       |              | SD   | 0.90   | 1.45  | 1.95  | 1.86  | 1.56  | 2.33  | 1.84  | 1.35  | 1.52   | 2.44  | 1.23   | 1.78   | 1.69 |
|                                       | <i>GAPDH</i> | Mean | 0.41   | 4.14  | 0.69  | 3.59  | 1.30  | 2.43  | 10.02 | 8.04  | -2.89  | 5.05  | -2.34  | -0.53  |      |
|                                       |              | SD   | 1.86   | 2.06  | 1.86  | 0.90  | 1.92  | 2.04  | 1.67  | 1.67  | 1.46   | 2.72  | 1.32   | 1.99   | 1.79 |



|              |      |       |       |       |       |       |       |       |       |       |       |       |       |      |
|--------------|------|-------|-------|-------|-------|-------|-------|-------|-------|-------|-------|-------|-------|------|
| <i>G6PDH</i> | Mean | -2.43 | -2.02 | 1.70  | -1.75 | 1.15  | -1.13 | 7.59  | 5.61  | -5.32 | 2.61  | -4.78 | -2.96 |      |
|              | SD   | 2.04  | 1.80  | 1.43  | 1.49  | 2.33  | 1.63  | 1.22  | 2.07  | 1.27  | 2.71  | 1.86  | 2.09  | 1.83 |
| <i>18S</i>   | Mean | 0.53  | 0.95  | 4.67  | 1.22  | 4.12  | 1.83  | 2.96  | 10.56 | 8.57  | -2.36 | 5.58  | 1.81  |      |
|              | SD   | 1.99  | 1.47  | 1.89  | 1.65  | 1.78  | 1.66  | 2.09  | 1.47  | 1.82  | 1.74  | 2.90  | 1.73  | 1.85 |
| <i>L3</i>    | Mean | -5.05 | -4.63 | -0.91 | -4.36 | -1.46 | -3.75 | -2.61 | 4.98  | 3.00  | -7.93 | -7.39 | -5.58 |      |
|              | SD   | 2.72  | 1.99  | 2.46  | 2.48  | 2.44  | 2.26  | 2.71  | 2.78  | 2.91  | 2.41  | 2.59  | 2.90  | 2.55 |

\*deltaCt method was used for the data analysis.
